# Supplementary material for: Investigating metal (M = Mn, Fe, and Ni)-doped Co(OH) 2 nanofibers for electrocatalytic oxygen evolution and electrochemical biosensing performance
Source: Royal Society of Chemistry journal article supplement (doi:10.1039/d4ra04240a), 2024-01-01
Supplement: d4ra04240a1.pdf [file d4ra04240a1.pdf]

## Supplementary Information

### Investigating Metal (M= Mn, Fe, Ni)-doped Co(OH)<sub>2</sub> Nanofiber for Electrocatalytic Oxygen Evolution and Electrochemical Biosensing Performance

**Iqra Fareed<sup>a,b</sup>, Muhammad Danish Khan<sup>a,b</sup>, Sadia Murtaza<sup>c</sup>, Masood ul Hassan Farooq<sup>a</sup>, Zia Ur  
Rehman<sup>d</sup>, Muhammad Umer Farooq<sup>e</sup>, Faheem K. Butt<sup>e,\*</sup>, Muhammad Tahir<sup>e,f,\*</sup>**

- <sup>a)</sup> Laboratory of Eco-Materials and Sustainable Technology (LEMST), Natural Sciences and Humanities Department, New Campus, UET Lahore, 54890, Pakistan.
- <sup>b)</sup> Department of Physics, University of Engineering and Technology, Lahore, 54890, Pakistan.
- <sup>c)</sup> Department of Physics, University of Lahore, 53700, Pakistan.
- <sup>d)</sup> School of Environmental Science and Engineering, Yangzhou University, Yangzhou 225127, China.
- <sup>e)</sup> Department of Physics, Division of Science and Technology, University of Education, Lahore, 54770, Pakistan.
- <sup>f)</sup> School of Chemical Engineering, University of Birmingham, Birmingham, B15 2TT, UK.

\*Corresponding Author

Dr. Faheem K. Butt  
Associate Professor  
Department of Physics,  
Division of Science and Technology,  
University of Education, Lahore.  
[faheemk.butt@ue.edu.pk](mailto:faheemk.butt@ue.edu.pk)

Dr. M. Tahir  
School of Chemical Engineering,  
University of Birmingham,  
Birmingham, B15 2TT, UK.  
[m.tahir.3@bham.ac.uk](mailto:m.tahir.3@bham.ac.uk)

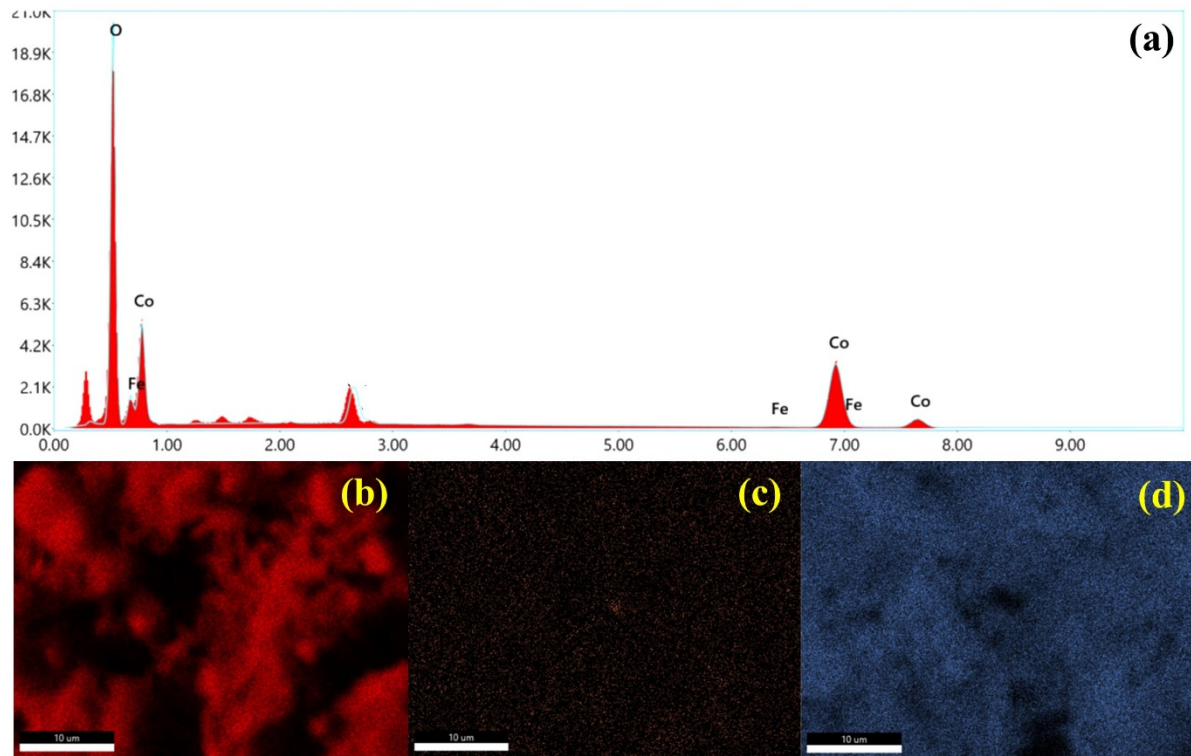

Figure S1- EDX spectra and elemental mapping of FCHNF.

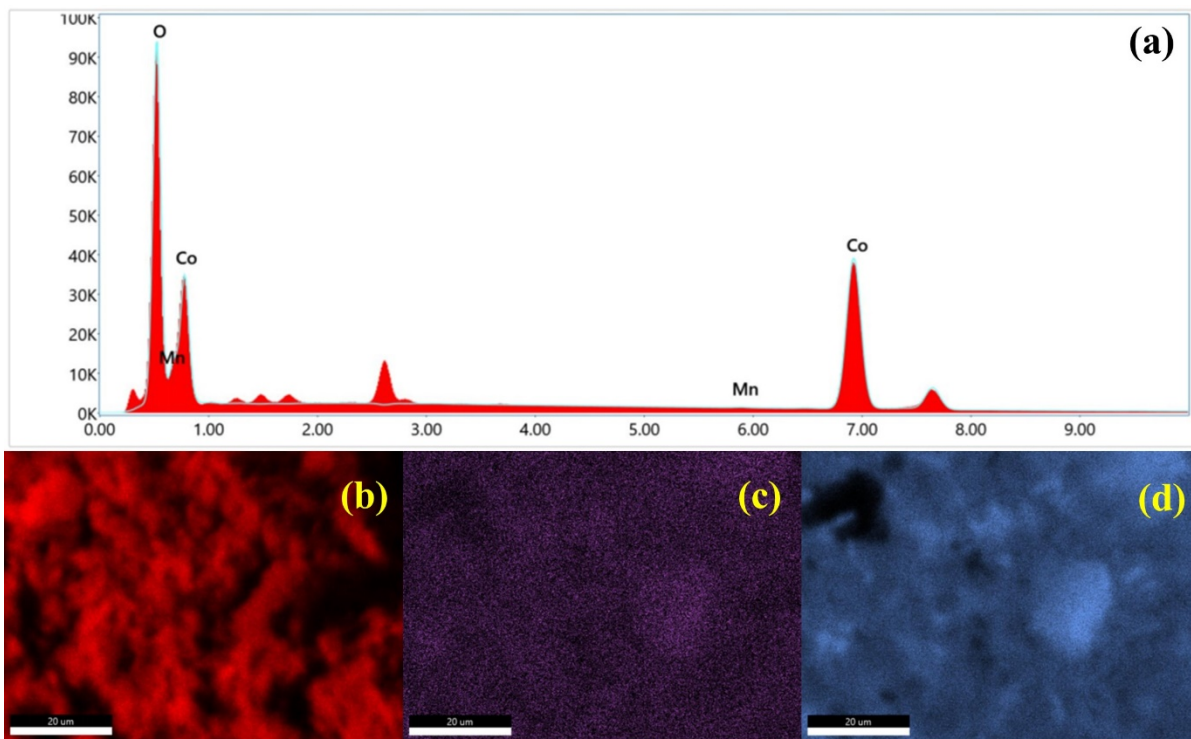

Figure 2-EDX spectra and elemental mapping of MCHNF.

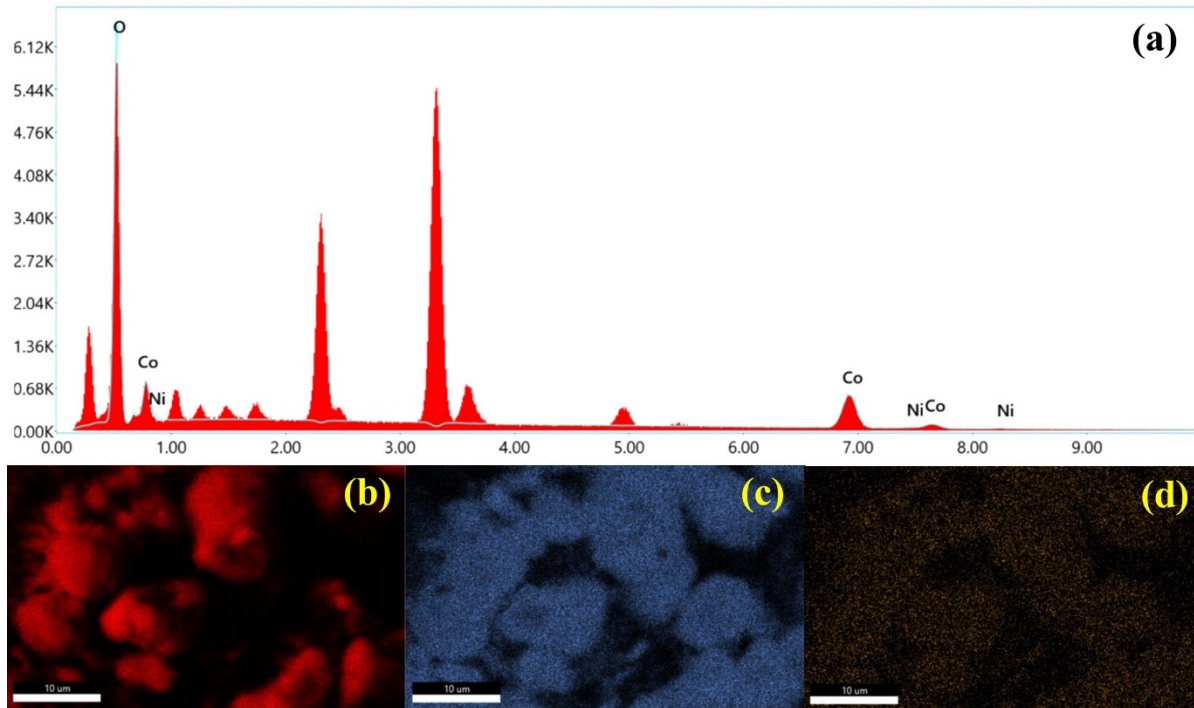

Figure S3-EDX spectra and elemental mapping of NCHNF.
